# Supplementary material
Source: Royal Society of Chemistry journal article supplement (doi:10.1039/d6se00328a)
Supplement: d6se00328a2.pdf [file d6se00328a2.pdf]

**Heterointerface Engineering of Cerium Fluoride Confined Molybdenum Nitride for Overall Water Splitting**

**Arokiadoss Davidrichetson, ‡Sundararajan Arivudainambi, Mayakrishnan Raj kumar, Murugan Vijayarangan, Jayaraman Jayabharathi\***

*Department of Chemistry, Materials Science Lab, Annamalai University, Annamalai nagar, Chidambaram, Tamilnadu 608002, India*

*‡Department of Entomology, Faculty of Agriculture, Annamali University, Annamalinagar, Chidambaram and Tamil Nadu*

*\*Corresponding author-. [jjayabharathi2022@gmail.com](mailto:jjayabharathi2022@gmail.com)*

**This file contains 28 pages in which the experimental section consists of materials and methods, characterization of an electrocatalyst, electrode preparation and characterization and Faradaic efficiency determination from RRDE.**

**No. of Figures- 14; No. of Equations- 13; Tables- 5**

## **SI-I. Experimental Section**

### **S1-E1. Materials**

$(\text{NH}_4)_6\text{Mo}_7\text{O}_{24}\cdot 4\text{H}_2\text{O}$ ,  $\text{NH}_4\text{F}$  and  $\text{Ce}(\text{NO}_3)_3\cdot 6\text{H}_2\text{O}$  was received from SISCO CHEM. Nickel Foam (NF) received from Vitra Technologies, India. Iridium oxide ( $\text{IrO}_2$ ), platinum derived carbon (Pt-C), Nafion 15% and alumina mesh received from Sigma Aldrich. All chemicals used as received without any further purification. The Deionized water was used throughout the experiment.

### **S1-E2. Characterization of an electrocatalyst**

High resolution transmission electron microscopy (HR-TEM) conducted on a JEOL JEM 2200FS microscope operated at 200 kV acceleration voltage, probe-side  $C_s$ -corrected, integrated with an Oxford X Max 100 Energy Dispersive X-ray (EDX) detector. Field Emission Scanning Electron Microscopy (FE-SEM) was conducted on ZEISS oxford and an accelerated voltage at 3 kV with the measurement of EDX. Structural interpretation of  $\text{CoO}_x$ -Bo identified with x-ray diffraction (XRD), were taken on a powder diffractometer (Rigaku, D/MAX, 2500 V) with Cu  $K\alpha$  radiation ( $\lambda=1.54056 \text{ \AA}$ ) operating at 40 KV and 250 mA. Chemical bond structure identified based on Fourier Transform Infrared (FT-IR) spectrometer Thermo Nicolet 6700. Raman measurement was carried out at room temperature, and the signals were recorded by using Raman spectroscopy (Renishaw) with a 514.5 nm laser excitation. XPS measurements were carried out in an ultra-high vacuum (UHV) set-up equipped with a monochromatic Al  $K\alpha$  X-ray source (1486.6 eV; anode operating at 12.25 kV and 300 W) and a high resolution Phoibos 150 MCD analyzer (SPECS). X-ray photoemission spectra were measured in fixed analyzer transmission mode with pass energy 20 eV and step size 0.5 and 0.05 eV for survey and region scans correspondingly.

### **S1-E3. Electrode preparation and characterization**

All electrochemical measurements were carried out on a Biologic SP-300 Potentiostat electrochemical workstation, the linear sweep voltammogram (LSV) test was carried out in 1 M KOH electrolyte with a scan rate of 10 mV/s three-electrode setup. To prepare catalyst ink, 0.5 mg of the as-prepared CeF<sub>3</sub>@Mo<sub>2</sub>N was evenly dispersed in 0.5 mL of propanol, and then the as-obtained solution was treated with ultrasound for 20 min. For comparison, a 0.005 mg/ml commercial IrO<sub>2</sub> and Pt/C suspension was made using a comparable methodology. Before coating, the NF was washed with acetone, HCl aqueous solution, deionized water and ethanol in sequence. In a three-electrode setup nickel foam (NF) as the working electrode, Ag/AgCl (3M KCl) as reference electrode, and a platinum wire as counter electrode. Measured potentials were referred to the reversible hydrogen electrode (RHE)  $E_{RHE} = E_{Ag/AgCl} + 0.923$  V. The resistances of as prepared electrocatalysts were acquired from EIS tests at the overpotential of different mV (vs. RHE) in the frequency scope of 100 kHz to 10 mHz. The durability was tested by cyclic voltammetry (CV) and current-time (i-t) curve tests.

### **SI-E4. Faradaic efficiency determination from RRDE**

In order to evaluate the faradaic efficiency and reaction mechanism of CeF<sub>3</sub>@Mo<sub>2</sub>N catalyst for OER, rotating ring-disk electrode (RRDE) voltammograms were carried out based on a glassy carbon disk electrode and Pt ring electrode. The CeF<sub>3</sub>@Mo<sub>2</sub>N catalyst, as prepared, was coated onto RRDE by following the procedure described above. The Faradaic Efficiency for CeF<sub>3</sub>@Mo<sub>2</sub>N in OER process was calculated by using Rotating

Ring-Disk (RRD) technique as follows:

Ring current ( $I_{ring}$ ) = 0.0379 mA

Disc current ( $I_{disc}$ ) = 0.1750 mA

Collection Efficiency (N) = 0.235 (The Collection Efficiency (N) value calculated experimentally by using ferri/ferrocyanide system in 0.1 M KCl with 10 mM  $K_3[Fe(CN)_6]$ , the data are given Table

## SI-II. Calculations

### SI. C1. Calculation of Overpotential ( $\eta$ )

The overpotential ( $\eta$ ) was determined according to the formula:  $\eta$  (V) = E (RHE) - 1.23 V

### SI. C2. Calculation of Tafel slope

Tafel plots were derived from the LSV curves and the Tafel slope was calculated using the equation:  $\eta = a + b \log j$ , where  $\eta$ -overpotential,  $a$ -exchange current density,  $b$  -Tafel slope and  $j$ - corresponding current density ( $mA/cm^2$ ) as well as Tafel constant

### SI. C3. Calculation of ECSA

The calculations of ECSA and roughness factor (RF) are based on the following equation:  $ECSA = C_{dl} / C_s$ ;  $RF = ECSA / GSA$ , where  $C_{dl}$ - double layer capacitance of catalyst in 1.0 M KOH (mF) and  $C_s$ - specific capacitance of the catalyst ( $C_s = 0.04$  mF  $cm^{-2}$  in 1.0 M KOH). In eq (5), RF - roughness factor and GSA - geometric surface area of the material.

### SI.C4. Calculation of Specific Activity

The specific activity ( $mA/cm^2_{ECSA}$ ) of electrocatalysts was calculated by the equation of:

- (i) Specific activity =  $j/10 \times ECSA_{BET} \times$  amount of loading
- (ii) Specific activity =  $j/10 \times ECSA_{Cdl} \times$  amount of loading

### SI.C5. Calculation of Turnover frequency (TOF), Active site density and Nature of the charge storage process

The TOF is defined as the number of  $H_2$  or  $O_2$  molecules evolved per active site per second.

TOF of  $O_2$  or  $H_2$  =  $TOF = i \frac{S_{geo}}{4Fm}$ , where, where  $j$ ,  $S_{geo}$ ,  $F$ , and  $m$  signified current density ( $mA/cm^2$ ), geometric surface area ( $cm^2$ ) of the working electrode, Faraday constant (96,485 C/mol) and moles of the active catalyst species, respectively. For TOF analysis, determination

of concentration ( $m$ ) of surface active species is a major challenge. Finding the position of active centers can provide the necessary guidance to determine  $m$ . To know the active site concentration,  $i$  versus  $v^{1/2}$  was plotted using the following equation

$$i = \pm 0.436nFA_{real}C\sqrt{nFDv/RT}$$

The number of active sites is attributed by ( $A_{real}C$ ), where  $A_{real}$  and  $C$  refer to total electrochemical area and active site concentration, respectively. The  $C$ ,  $D$ , and  $A_{real}$  manifest the per-site concentration, diffusion constant and electrochemical area, respectively. The active site density was calculated by considering  $D = 1$  and  $n = 1$ . Identifying the position of the catalytically active centers in the catalyst by using the following mathematical expression can provide the necessary guidance to accurately determine  $m$   $i = av^b$ ;  $\log i = \log a + b \log v$ ,  $b$  value was calculated from the  $\log(\text{current})$  versus  $\log(\text{scan rate})$  plot, where  $i$  and  $v$  denote the current and scan rate, respectively. For  $b \sim 0.5$ , the ion intercalation (diffusion) mechanism predominates, indicating that majority of the active sites are at the interlayer spacing, while a surface-controlled process is expected for  $b \sim 1$ .

### SI. C6. Faradaic efficiency determined from RRDE

In order to evaluate the faradaic efficiency and reaction mechanism of  $\text{CeF}_3@Mo_2N$  catalyst for OER, rotating ring-disk electrode (RRDE) voltammograms were carried out based on a glassy carbon disk electrode and Pt ring electrode. The  $\text{CeF}_3@Mo_2N$  catalyst, as prepared, was coated onto RRDE by following the procedure described above. The Faradaic Efficiency for  $\text{CeF}_3@Mo_2N$  in OER process was calculated by using Rotating

Ring-Disk (RRD) technique as follows:

$$\text{Ring current } (I_{ring}) = 0.0379 \text{ mA}$$

$$\text{Disc current } (I_{disc}) = 0.1750 \text{ mA}$$

Collection Efficiency (N) = 0.235 (The Collection Efficiency (N) value calculated experimentally by using ferri/ferrocyanide system in 0.1 M KCl with 10 mM  $K_3[Fe(CN)_6]$ , the data are given in Table.

### SI. C7. Determination of energy of activation

With the CVs results, we can obtain the apparent activation energy ( $E_a$ ) calculated using the Arrhenius equation:  $\ln j = -E_a/RT + b$ , where  $j$ - current density,  $R$ -gas constant,  $T$ -Temperature and  $b$ -slope.

### SI. C8. Calculation of rate constant

The rate constant of the electrolysis at various pH was determined from Trumpet plot by following  $k_0 = (1-\alpha)nFv_a/RT$ , where  $R$ -gas constant,  $T$ -absolute temperature,  $\alpha$ -electron transfer coefficient,  $n$ -number of electrons transferred and  $v_a$  and  $v_c$  are anodic and cathodic slopes of the Trumpet plot, respectively.

### SI. C9. Calculation of Laviron equation

$E_c = E_{1/2} - (RT/\alpha nF) \times \{\ln(\alpha nF/RTk_s) + \ln(v)\}$ , where  $E_c$  is the reduction potential of metal redox,  $E_{1/2}$  is the formal potential of metal redox,  $R$  is universal gas constant,  $T$  is temperature in Kelvin,  $n$  is number of electrons transferred,  $F$  is the Faraday constant,  $\alpha$  is the transfer coefficient,  $k_s$  is the rate constant of metal redox, and  $v$  is scan rate in the CV measurement.

The Laviron analysis highlights the peak positions of redox peaks prior to OER at different scan rates in materials, while other parameters including  $R$ ,  $T$  and  $n$  are taken from literatures.  $k_s$  and  $\alpha$  values can be concluded from the intercept and slope of the linear plot of  $E_c$  with respect to  $\ln v$ . Herein, the rate constant of metal redox  $k_s$  derived from equation can be used to qualitatively compare the binding strength of Ni sites to  $OH^-$  in electrolyte. The larger  $k_s$ , the enhanced  $OH^-$  adsorption.

**SI. C10. Proton reaction order ( $\rho_{RHE}$ )**

The proton reaction order ( $\rho_{RHE}$ ) was determined on RHE scale from the following relation

$$\rho_{RHE} = \left( \frac{\partial \log(i)}{\partial pH} \right)_E = - \left( \frac{\partial E}{\partial pH} \right)_i / \left( \frac{\partial E}{\partial \log(i)} \right)_{pH}$$

**SI. C11. Calculation of H<sub>2</sub> and O<sub>2</sub> generation**

Based on the displaced amount of water due to the hydrogen bubbles the amount of hydrogen generated was calculated using the below relationships.

Amount of O<sub>2</sub> generated in 1 h = Amount of water displaced in litres

Amount of O<sub>2</sub> generated in moles for 1 h =  $\frac{\text{Amount of water displaced (liters)}}{22.4 \text{ liters}}$

The O<sub>2</sub> generation rate was calculated from the electrical charge passed through the electrode using the equation given below.

Current obtained during electrolysis x Time duration for each potential = Coulomb

$\frac{\text{Coulomb} \times F}{96485C}$  = No. of moles of e<sup>-</sup> for H<sub>2</sub>/O<sub>2</sub> generation

$\frac{\text{No. of moles of e}^- \text{ for H}_2 \text{ or O}_2 \text{ generation} \times 1 \text{ mole of H}_2 \text{ or O}_2 \text{ gas}}{4/2 \text{ moles of electron generated}}$  = Moles of H<sub>2</sub>/O<sub>2</sub>

**SI. C12. Faradaic efficiency**

At the constant potential of 1.59V given across the CeF<sub>3</sub>@Mo<sub>2</sub>N/NF//CeF<sub>3</sub>@Mo<sub>2</sub>N/NF electrode couples assembled and sealed in H-type full cell in 1.0 M KOH. During the electrolysis, evolved gas molecules were measured by the water displacement method. The applied potential can provide 10 mA cm<sup>-2</sup> current density to the system and the electrolysis was monitored for 60 min. each 10 minutes of analysis data shown in the data. Theoretical number of moles of gas molecules can be calculated from Faraday's second law of electrolysis according to the following equation:  $V_t = Q/nF$ , where  $V_t$  - number of O<sub>2</sub> molecules calculated theoretically,  $Q$ -total charge passed to the cell systems,  $n$ -number of electrons ( $n=4$  for O<sub>2</sub>) and

F-Faraday constant 96485.3 C/mol. The Faradaic Efficiency of OER was estimated using the following equation:  $FE = 4Fn_{O_2}/It \times 100\%$ , where F is Faraday constant (96485 C/mol),  $n_{O_2}$  is the number of moles of experimental  $O_2$  during the reaction (mol),  $n_{H_2}$  is the number of moles of experimental  $H_2$  during the reaction (mol), I is the current of the reaction (A), and t is the reaction time (s).

### **SI. C13. Determination of Power consumption**

Based on Faraday's law, power consumption for water electrolysis process can be expressed as follows: Energy consumption ( $kWhm^{-3}$ ) =  $V_{cell} \times nF/3600 \times 1/V_m$ , where,  $V_{cell}$  - voltage during electrolysis, n - number of electrons (4 for OER: 2 for HER), F -Faraday constant of 96,500 C  $mol^{-1}$  and  $V_m$  - molar volume of gas to be 24.47 L  $mol^{-1}$  at 25 °C and 1 atm.

## SI-III. Figures

Figure S1. Elemental mapping of  $\text{CeF}_3@Mo_2N$ : (a) Ce; (b) Mo; (c) F; (d) N and (e) EDX spectrum of  $\text{CeF}_3@Mo_2N$ 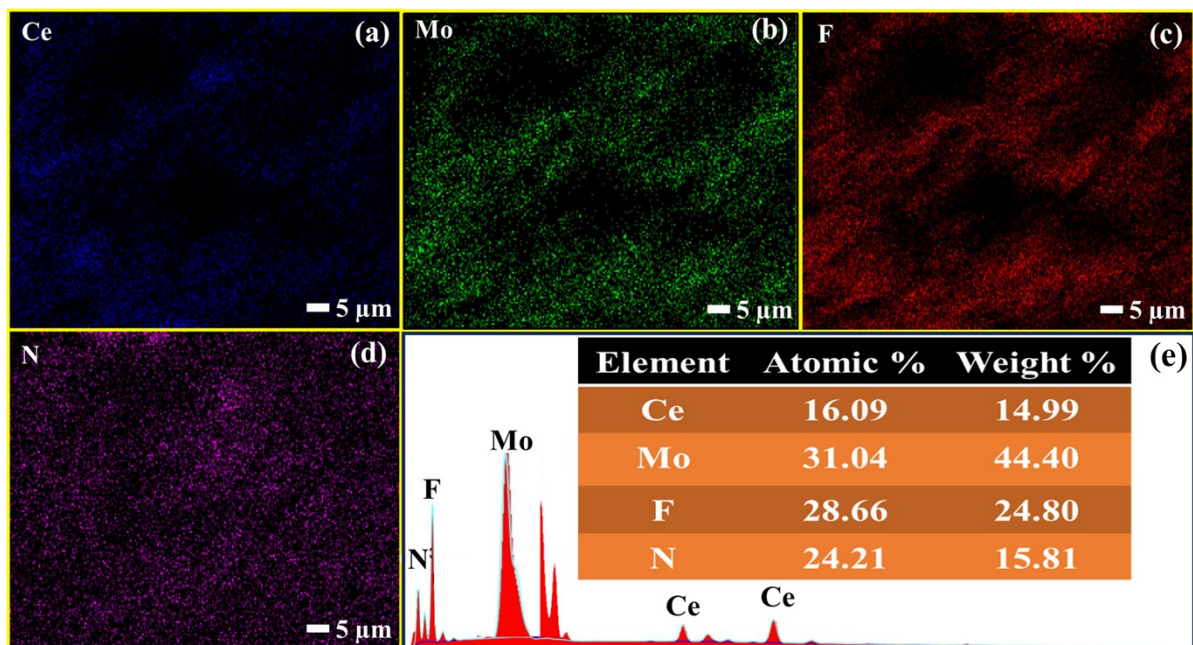Figure S2. Static water contact-angle measurements with illustration of  $O_2$  bubbles releasing behaviour of the electrodes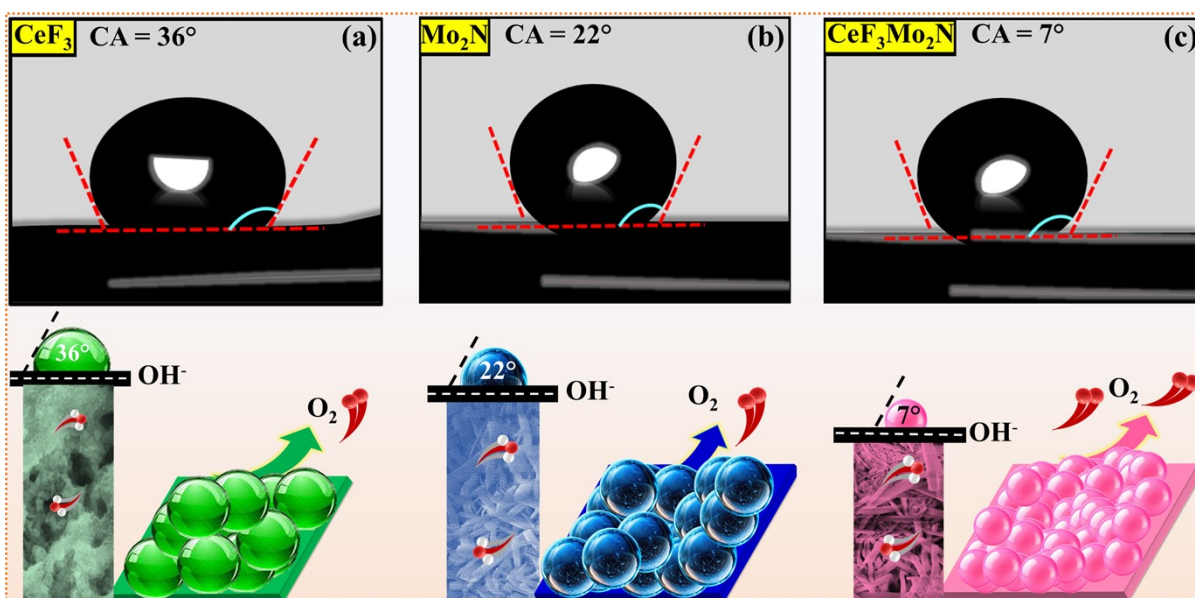

Figure S3. CVs recorded at non-faradaic region to estimate the Cdl values: (a)  $\text{CeF}_3@Mo_2N$ ; (b)  $Mo_2N$  and (c)  $CeF_3$

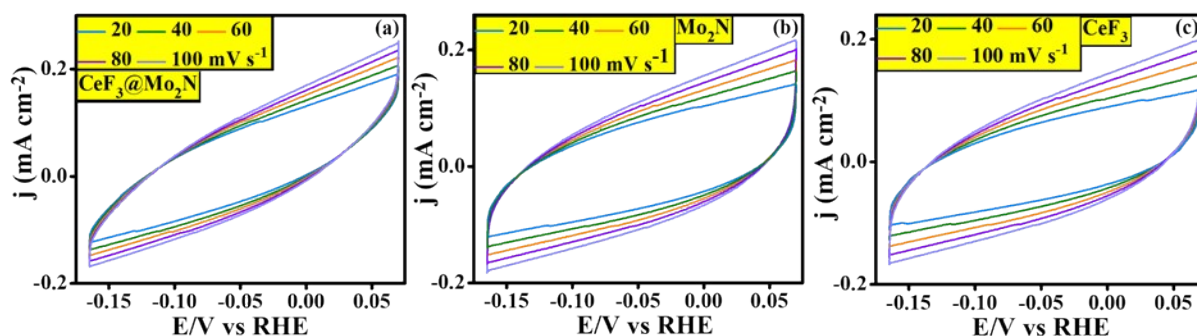

Figure S4. (a) ECSA-Normalized LSV curves, (b) Bet-Normalized LSV curves (c) Mass Normalized LSV curves (d) Mass activity of as prepared electrocatalysts, (e) Plot of  $\log i$  vs  $\log v$  to determine catalytic site density and (f) TOF-Normalized LSV curves of OER

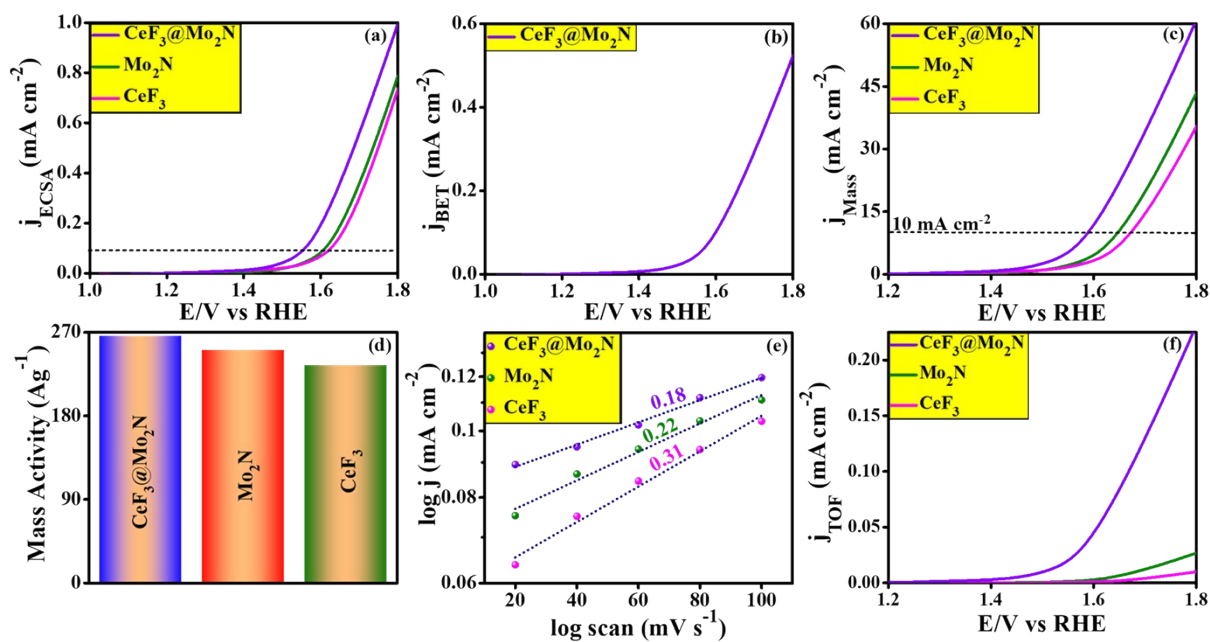

**Figure S5. (a)** LSV responses of RRD electrode for redox reaction of ferro-ferric in 0.1 M  $\text{KNO}_3$  with 10 mM of  $\text{K}_3[\text{Fe}(\text{CN})_6]$  at various rotation speed by using RRD electrode, **(b)** Equivalent circuit model used to analyse interfacial electron transfer and **(c)** Operando dynamic specific resistance at OER overpotential of  $\text{CeF}_3@Mo_2N$ ,  $Mo_2N$  and  $\text{CeF}_3$  in 1M KOH

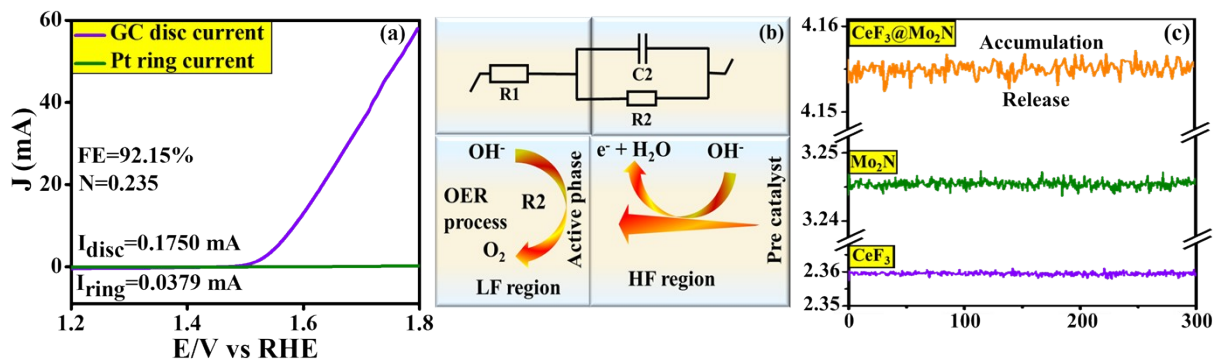

**Figure S6. Cyclic voltammogram of  $\text{CeF}_3@Mo_2N$  at various pH: pH-14 (a), pH-13 (b) and pH-12 (c) with potential range of 10-100 mV and peak potential of  $\text{CeF}_3@Mo_2N$  with respect to logarithm of scan rate [V/s] during CV at pH-14 (d), pH-13 (e) and pH-12 (f) (violet: anodic peak; green: cathodic peak)**

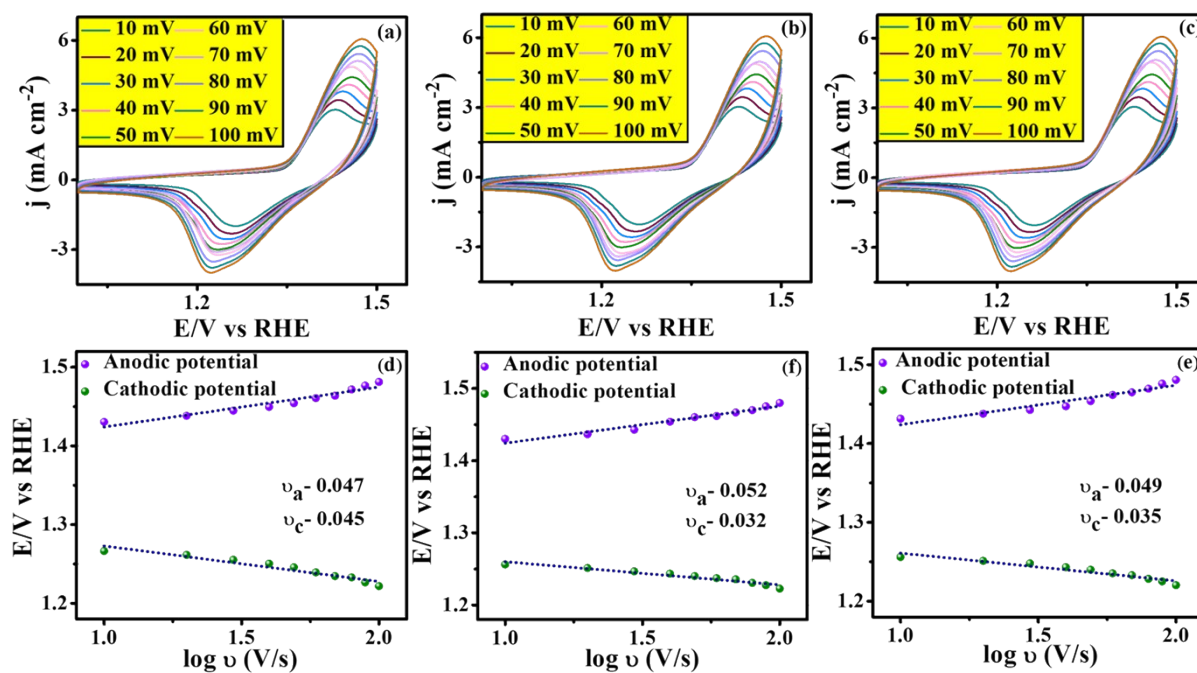

Figure S7. Cyclic voltammogram of  $\text{Mo}_2\text{N}$  at various pH of 14 (a), 13 (b) and 12 (c) with potential range of 10-100 mV and Peak potential of  $\text{Mo}_2\text{N}$  with respect to logarithm of scan rate [V/s] during CVs at various pH of 14 (d), 13 (e) and 12 (f) (Violet: anodic Peak; Green: cathodic peak)

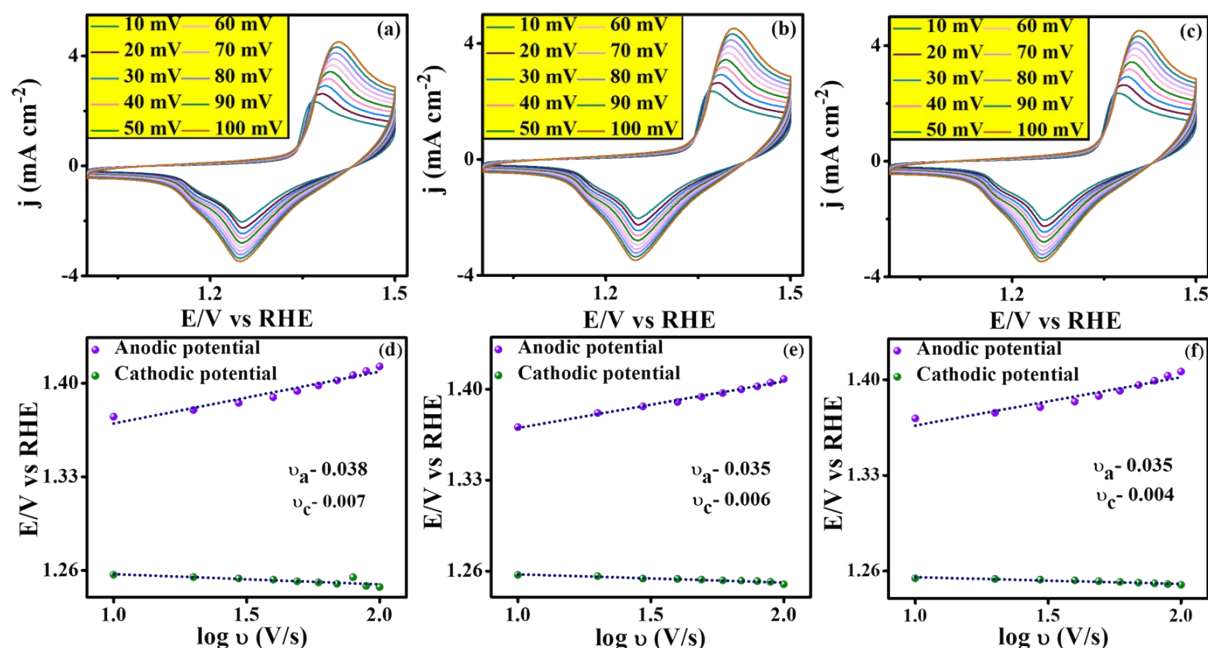

Figure S8. Cyclic voltammogram of  $\text{CeF}_3$  at various pH of 14 (a), 13 (b) and 12 (c) with potential range of 10-100 mV and Peak potential of  $\text{CeF}_3$  with respect to logarithm of scan rate [V/s] during CVs at various pH of 14 (d), 13 (e) and 12 (f) (Violet: anodic Peak; Green: cathodic peak)

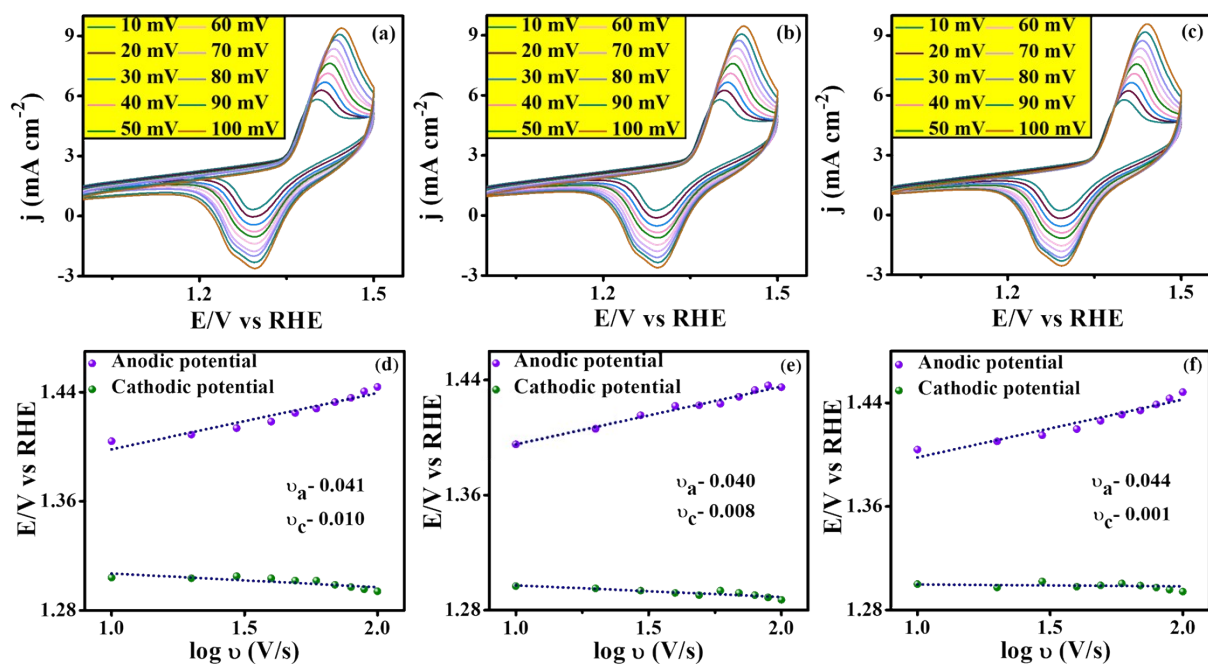

Figure S9. (a-c) Plots of redox peak current densities versus the square root of scan rates and (d-f) Laviron analysis of  $\text{CeF}_3@Mo_2N$ ,  $Mo_2N$  and (f)  $CeF_3$

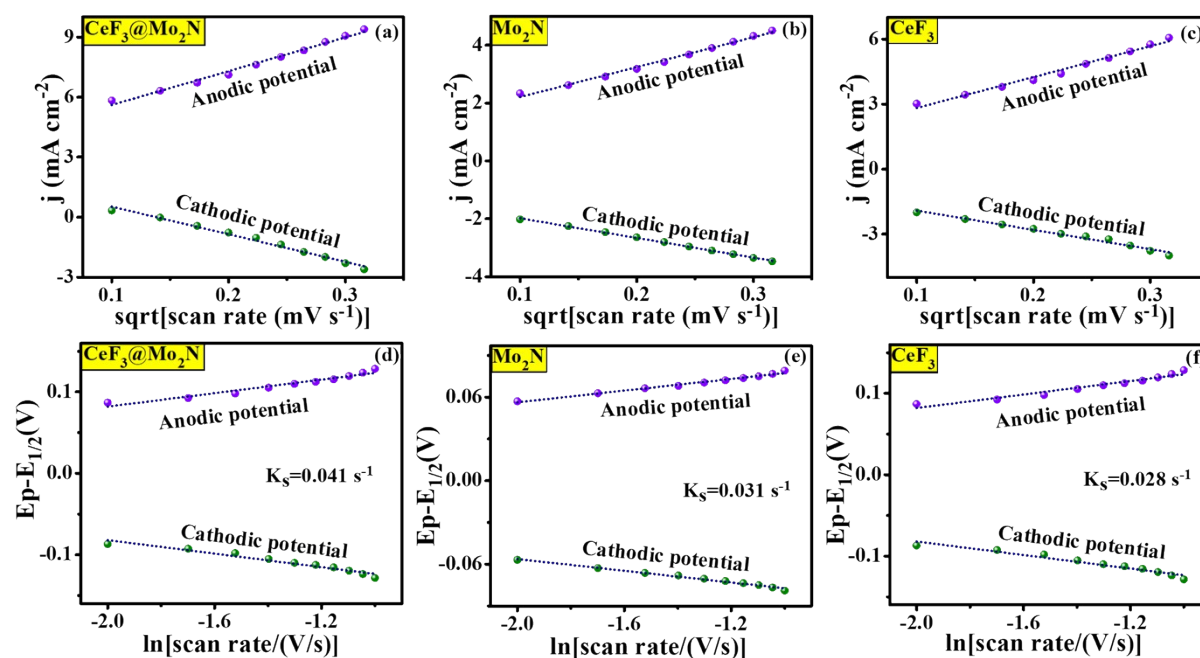

Figure S10. EGOR performance in alkaline water without  $iR$ -correction: (a) LSV polarization curves, (b) CV curve of  $\text{CeF}_3@Mo_2N$ , (c) Bar diagram of overpotential at various current density of  $\text{CeF}_3@Mo_2N$ , (d) Tafel plots derived from LSV curves, (e) Nyquist plot obtained from EIS at 1.59 V vs RHE (inset: Randles circuit) and (f) Chronopotentiometry curve of  $\text{CeF}_3@Mo_2N$  at current density of  $10 \text{ mA cm}^{-2}$

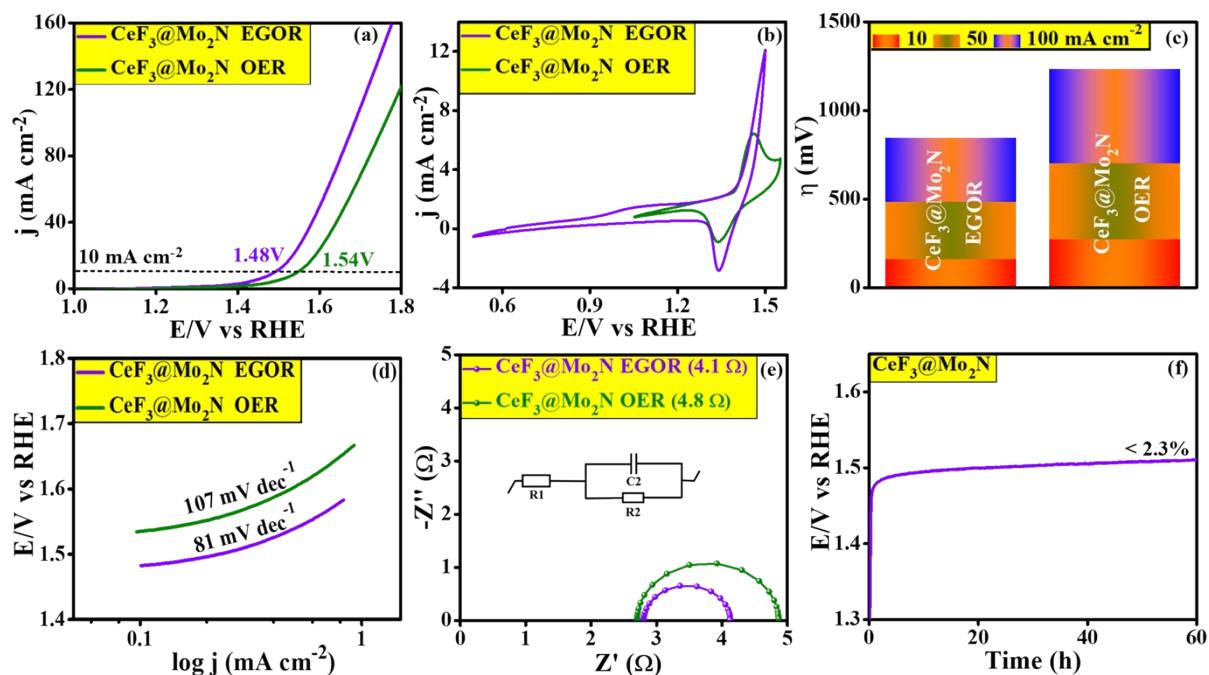

**Figure S11. (a) ECSA-Normalized LSV curves, (b) Bet-Normalized LSV curves (c) Mass Normalized LSV curves (d) Mass activity of as prepared electrocatalysts, (e) Associated charges (AC) of  $\text{CeF}_3@Mo_2N$ ,  $Mo_2N$ ,  $CeF_3$  and (f) TOF-Normalized LSV curves of HER**

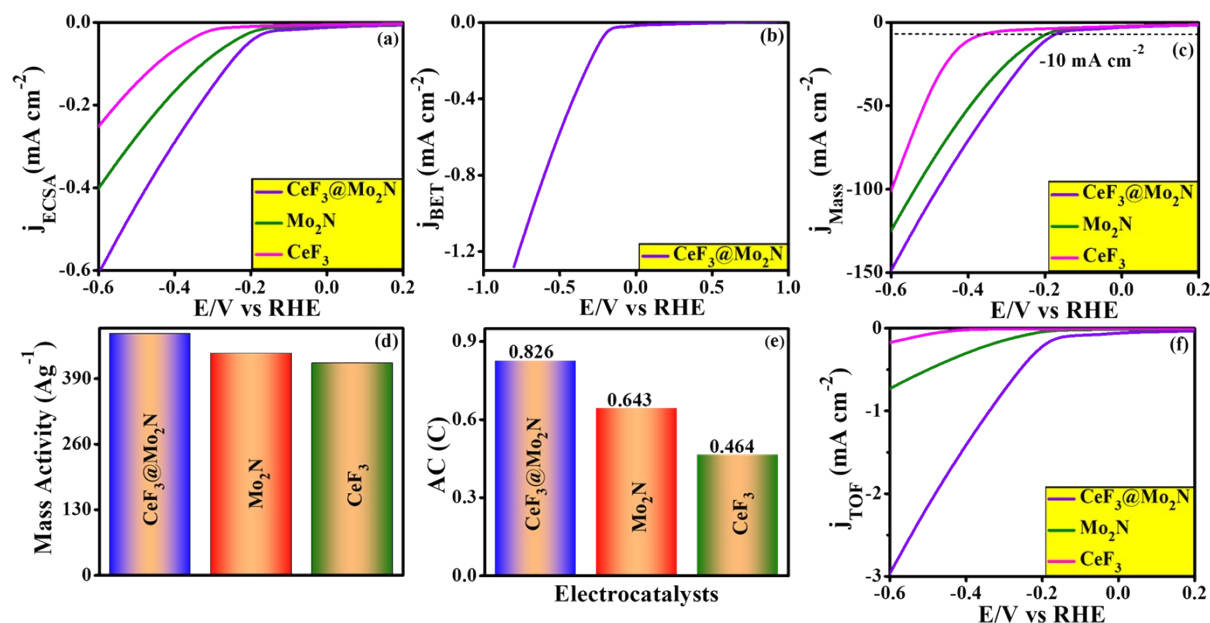

**Figure S12. Bode plots at different potentials: (a)  $CeF_3@Mo_2N$ , (b)  $Mo_2N$  and (c)  $CeF_3$ , Nyquist plot measured at various applied voltages: (d)  $CeF_3@Mo_2N$ , (e)  $Mo_2N$  and (f)  $CeF_3$**

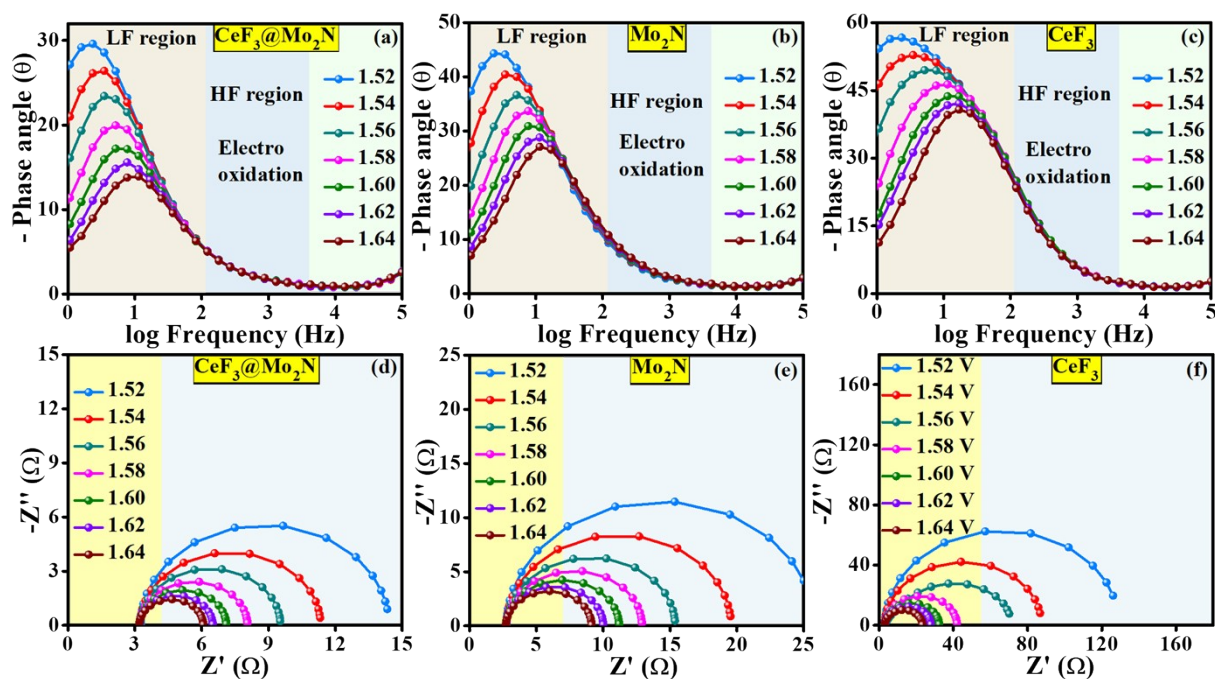

**Figure S13. Mott-Schottky plots: (a,b) CeF<sub>3</sub> and Mo<sub>2</sub>N; Tauc plots: (c,d) CeF<sub>3</sub> and Mo<sub>2</sub>N and (e) Energy band diagram of CeF<sub>3</sub> and Mo<sub>2</sub>N in CeF<sub>3</sub>@Mo<sub>2</sub>N under before and after Schottky contact**

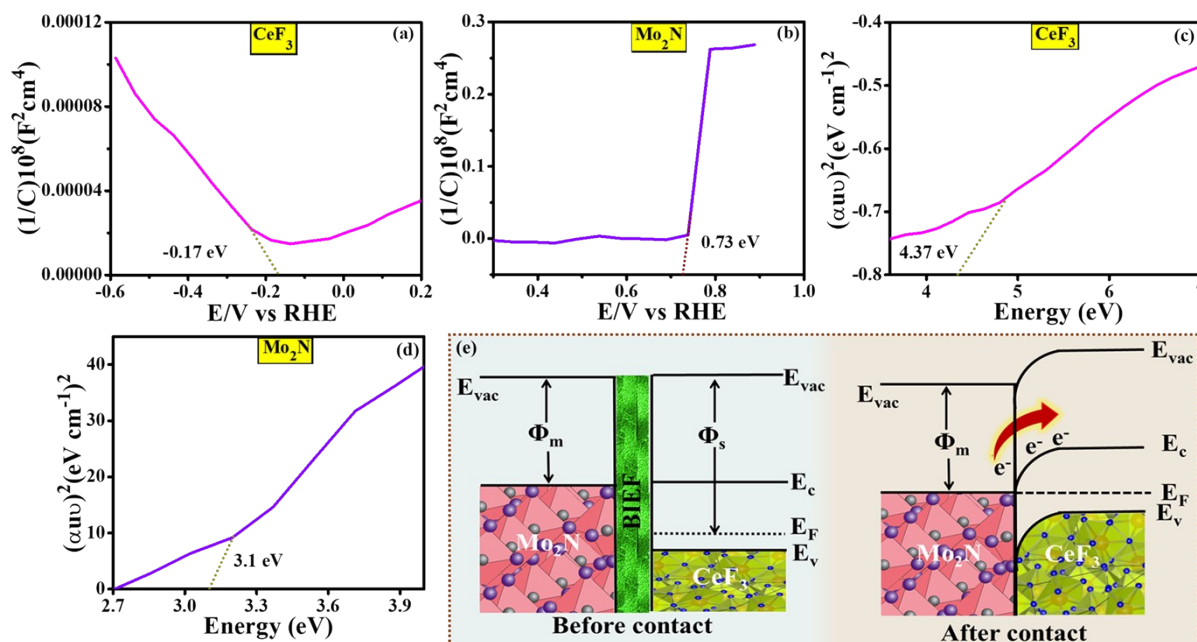

It is well known that band gap was determined from Tauc model by following the equation  $(h\nu)$  as  $(\alpha h\nu)^2 = A(h\nu - E_g)$ , where  $\alpha = 2.303A/L$  ( $L$ -path length/10 mm,  $A$ -absorbance). The  $E_g$  of CeF<sub>3</sub> and Mo<sub>2</sub>N was extracted by extrapolating the intercept of linear relation of  $(\alpha h\nu)^2$  vs  $h\nu$  to  $y=0$ .

Figure S14. Post-XPS spectra of  $\text{CeF}_3@Mo_2N$ : (a) Mo and (b) Ce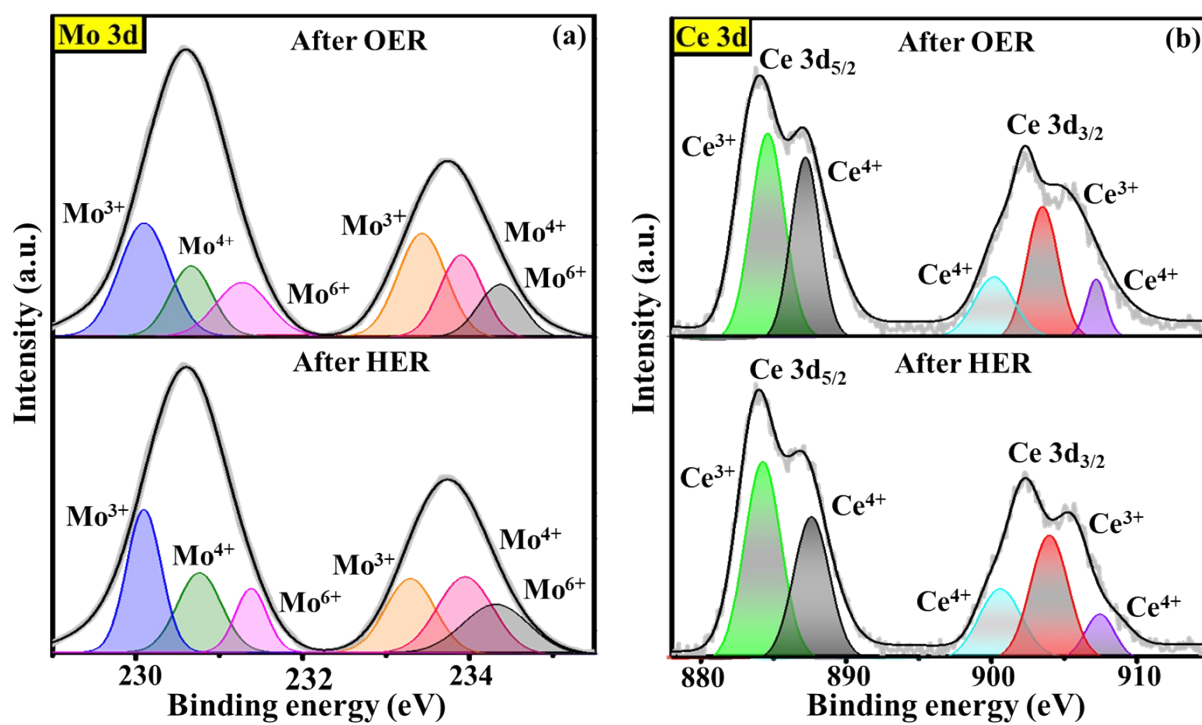

## SI-IV. Tables

**Table S1. Comparison of OER performance of CeF<sub>3</sub>@Mo<sub>2</sub>N with reported metal-based catalysts**

| S.No | Catalyst                                                  | Overpotential (mV) | Substrate | Reference           |
|------|-----------------------------------------------------------|--------------------|-----------|---------------------|
| *    | <b>CeF<sub>3</sub>@Mo<sub>2</sub>N</b>                    | <b>311</b>         | <b>NF</b> | <b>Present work</b> |
| 1    | Ni <sub>3</sub> N-CNTs                                    | 321                | NF        | S1                  |
| 2    | Ni <sub>3</sub> N                                         | 370                | NF        | S2                  |
| 3    | Co <sub>2</sub> N                                         | 390                | NF        | S3                  |
| 4    | Bulk Ni <sub>3</sub> FeN                                  | 320                | NF        | S4                  |
| 5    | RuO <sub>2</sub> /IF                                      | 348                | NF        | S5                  |
| 6    | Co <sub>4</sub> N-CeF <sub>3</sub>                        | 320                | GC        | S6                  |
| 7    | Co-VN@C                                                   | 330                | NF        | S7                  |
| 8    | Ni <sub>0.42</sub> Co <sub>0.58</sub> F <sub>2</sub> -G   | 313                | NF        | S8                  |
| 9    | Co-Ni <sub>3</sub> N                                      | 307                | NF        | S9                  |
| 10   | TiN@Ni <sub>3</sub> N                                     | 350                | CC        | S10                 |
| 11   | Ni <sub>3</sub> FeN                                       | 355                | NF        | S11                 |
| 12   | Ni <sub>3</sub> N                                         | 325                | GC        | S12                 |
| 13   | Mo <sub>2</sub> N                                         | 353                | NF        | S13                 |
| 14   | Co-Mo-N-PHP                                               | 325                | CC        | S14                 |
| 15   | WN/CC                                                     | 325                | NF        | S15                 |
| 16   | NiCo <sub>2</sub> N/NF                                    | 370                | NF        | S16                 |
| 17   | W <sub>2</sub> N/WC                                       | 320                | NF        | S17                 |
| 18   | Co <sub>3</sub> O <sub>4</sub> -NC/N rGO                  | 440                | NF        | S18                 |
| 19   | CoO-N-doped graphene                                      | 340                | NF        | S19                 |
| 20   | Co/VN                                                     | 320                | CC        | S20                 |
| 21   | Co@NC-3/1                                                 | 370                | NF        | S21                 |
| 22   | Co@Co <sub>3</sub> O <sub>4</sub> /NC                     | 410                | GC        | S22                 |
| 23   | Ni <sub>3</sub> N-Co <sub>3</sub> N                       | 320                | NF        | S23                 |
| 24   | Cu@CeO <sub>2</sub> @NFC-0.25                             | 340                | GC        | S24                 |
| 25   | CeOx/CoOx                                                 | 350                | NF        | S25                 |
| 26   | CeO <sub>2</sub> @PIZA/FTO                                | 370                | Au        | S26                 |
| 27   | NCNTFs                                                    | 370                | NF        | S27                 |
| 28   | PNC/Co                                                    | 370                | NF        | S28                 |
| 29   | Co <sub>3</sub> O <sub>4</sub> @Z67-N700@CeO <sub>2</sub> | 351                | NF        | S29                 |
| 30   | Ce-NiO-E                                                  | 382                | CC        | S30                 |

**Table S2: Collection Efficiency (N) value for the redox reaction of ferro-ferri in 0.1 M KNO<sub>3</sub> with 10 mM of K<sub>3</sub>[Fe(CN)<sub>6</sub>] at various rotation speed by RRD electrode**

| S.No | Rotation speed (RPM) | Disc current (mA) | Ring current (mA) | Collection Efficiency (N) |
|------|----------------------|-------------------|-------------------|---------------------------|
| 1    | 300                  | 0.36325           | 0.1031114         | 0.24053333                |
| 2    | 600                  | 0.30500           | 0.0543410         | 0.17816393                |
| 3    | 900                  | 0.43106           | 0.0777699         | 0.18025100                |
| 4    | 1200                 | 0.67308           | 0.0687140         | 0.10208890                |
| 5    | 1500                 | 0.37887           | 0.1376220         | 0.20117718                |

**Table S3. Trumpet plot parameters: <sup>(a)</sup>Slope of the anodic peak; <sup>(b)</sup>Slope of the cathodic peak; <sup>(c)</sup>Electron transfer coefficient and <sup>(d)</sup>Standard rate constant of CeF<sub>3</sub>@Mo<sub>2</sub>N, Mo<sub>2</sub>N and CeF<sub>3</sub>**

| Catalysts                           | pH | $v_a$ [V/log(V/s)] <sup>(a)</sup> | $v_c$ [V/log(V/s)] <sup>(b)</sup> | $\alpha$ <sup>(c)</sup> | $k^0$ [1/s] <sup>(d)</sup> |
|-------------------------------------|----|-----------------------------------|-----------------------------------|-------------------------|----------------------------|
| CeF <sub>3</sub> @Mo <sub>2</sub> N | 12 | 0.0520                            | 0.0323                            | 0.6190                  | 0.7657                     |
|                                     | 13 | 0.0491                            | 0.0351                            | 0.5833                  | 0.8017                     |
|                                     | 14 | 0.0474                            | 0.0452                            | 0.5108                  | 0.9223                     |
| Mo <sub>2</sub> N                   | 12 | 0.0353                            | 0.0049                            | 0.8781                  | 0.0799                     |
|                                     | 13 | 0.0359                            | 0.0063                            | 0.8387                  | 0.2087                     |
|                                     | 14 | 0.0387                            | 0.0076                            | 0.8358                  | 0.2473                     |
| CeF <sub>3</sub>                    | 12 | 0.0447                            | 0.0014                            | 0.9696                  | 0.0023                     |
|                                     | 13 | 0.0402                            | 0.0081                            | 0.8322                  | 0.0528                     |
|                                     | 14 | 0.0412                            | 0.0100                            | 0.8046                  | 0.2133                     |

**Table S4. Comparison of HER performance of CeF<sub>3</sub>@Mo<sub>2</sub>N with reported metal-based catalysts**

| S.No | Catalyst                                                                          | Overpotential (mV) | Substrate | Reference           |
|------|-----------------------------------------------------------------------------------|--------------------|-----------|---------------------|
| *    | <b>CeF<sub>3</sub>@Mo<sub>2</sub>N</b>                                            | <b>195</b>         | <b>NF</b> | <b>Present work</b> |
| 1    | Ni <sub>3</sub> Fe nitride                                                        | 209                | NF        | S31                 |
| 2    | WN/rGO                                                                            | 265                | NF        | S32                 |
| 3    | Ni <sub>3</sub> N                                                                 | 208                | NF        | S33                 |
| 4    | WS <sub>2</sub> - NCNT                                                            | 225                | CC        | S34                 |
| 5    | δ-WN/Fe                                                                           | 209                | NF        | S35                 |
| 6    | NiMoN <sub>x</sub> /C                                                             | 220                | GC        | S36                 |
| 7    | Co <sub>0.6</sub> Mo <sub>1.4</sub> N <sub>2</sub>                                | 200                | NF        | S37                 |
| 8    | Fe-WCN                                                                            | 220                | NF        | S38                 |
| 9    | Co <sub>0.75</sub> Fe <sub>0.25</sub> @NC                                         | 202                | NF        | S39                 |
| 10   | Ni <sub>3</sub> N nanosheets                                                      | 350                | CC        | S40                 |
| 11   | Co <sub>3</sub> O <sub>4</sub> NW                                                 | 320                | CC        | S41                 |
| 12   | Co/VN/NC-1                                                                        | 250                | GC        | S42                 |
| 13   | Mo <sub>2</sub> N/NC-2                                                            | 217                | NF        | S43                 |
| 14   | Co-NRCNTs                                                                         | 260                | NF        | S44                 |
| 15   | Co@N-CNTs                                                                         | 275                | NF        | S45                 |
| 16   | Co-embedded N-CNTs                                                                | 370                | CC        | S46                 |
| 17   | CoFe@NCNT                                                                         | 270                | GC        | S47                 |
| 18   | g-C <sub>3</sub> N <sub>4</sub> /N-doped graphene                                 | 240                | NF        | S48                 |
| 19   | g-C <sub>3</sub> N <sub>4</sub> nanoribbon/graphene                               | 207                | NF        | S49                 |
| 20   | U-CNT-900                                                                         | 270                | NF        | S50                 |
| 21   | C <sub>3</sub> N <sub>4</sub> @NG                                                 | 240                | NF        | S51                 |
| 22   | g-C <sub>3</sub> N <sub>4</sub> /CeO <sub>2</sub> /Fe <sub>3</sub> O <sub>4</sub> | 310                | NF        | S52                 |
| 23   | 3D-rGO-CeO <sub>2</sub>                                                           | 340                | NF        | S53                 |
| 24   | Mo <sub>2</sub> C/CeO <sub>2</sub>                                                | 220                | NF        | S54                 |
| 25   | CeO <sub>2</sub> -Y <sub>2</sub> O <sub>3</sub> -Nd <sub>2</sub> O <sub>3</sub>   | 303                | NF        | S55                 |
| 26   | CeO <sub>2</sub> /Co(OH) <sub>2</sub>                                             | 317                | NF        | S56                 |
| 27   | Fe <sub>x</sub> Ni <sub>y</sub> /CeO <sub>2</sub>                                 | 240                | NF        | S57                 |
| 28   | 1:1 CeO <sub>2</sub> /CuO                                                         | 245                | NF        | S58                 |
| 29   | CeO <sub>2</sub> -NiCoP                                                           | 242                | NF        | S59                 |
| 30   | CeO <sub>2</sub> /Ni/NC                                                           | 320                | NF        | S60                 |

**Table S5. Comparison of overall performance of CeF<sub>3</sub>@Mo<sub>2</sub>N with reported metal-based catalysts**

| S.No | Catalyst                                              | Voltage ( $\eta_{10}$ ) | Reference    |
|------|-------------------------------------------------------|-------------------------|--------------|
| *    | CeF <sub>3</sub> @Mo <sub>2</sub> N                   | 1.59                    | Present work |
| 1    | Co-SCN-3/RGO                                          | 1.63                    | S61          |
| 2    | Fe <sub>2</sub> Ni <sub>2</sub> N/NF                  | 1.65                    | S62          |
| 3    | FeNi <sub>3</sub> N                                   | 1.62                    | S63          |
| 4    | MoN-Co <sub>2</sub> N/CP                              | 1.63                    | S64          |
| 5    | W <sub>2</sub> N <sub>3</sub> -10/Fe <sub>2</sub> N   | 1.68                    | S65          |
| 6    | Cu <sub>3</sub> N                                     | 1.60                    | S66          |
| 7    | NC@Cu <sub>2</sub> CoxN                               | 1.62                    | S67          |
| 8    | Ni-Mo nitride                                         | 1.60                    | S68          |
| 9    | Co-Mo <sub>2</sub> C@NCNT                             | 1.62                    | S69          |
| 10   | Ni-N/CFC                                              | 1.62                    | S70          |
| 11   | V-FeNi <sub>3</sub> N/Ni <sub>3</sub> N               | 1.63                    | S71          |
| 12   | Nb-Ni <sub>3</sub> N/NF                               | 1.61                    | S72          |
| 13   | Ni/Ni <sub>3</sub> CNCNT 650-2                        | 1.65                    | S73          |
| 14   | PO-Ni/Ni-N-CNFs                                       | 1.69                    | S74          |
| 15   | NiFe HNSs                                             | 1.70                    | S75          |
| 16   | NiCo <sub>2</sub> O <sub>4</sub> NW                   | 1.63                    | S76          |
| 17   | CoNi(OH) <sub>x</sub>   NiN <sub>x</sub>              | 1.65                    | S77          |
| 18   | NiMoN  CoN                                            | 1.63                    | S78          |
| 19   | CoMnO@CN                                              | 1.62                    | S79          |
| 20   | S <sub>3</sub> N-Fe/N/C-CNT                           | 1.60                    | S80          |
| 21   | NC@CuCoN <sub>x</sub>                                 | 1.62                    | S81          |
| 22   | CoN@VON                                               | 1.64                    | S82          |
| 23   | Co <sub>5.47</sub> N@NC                               | 1.62                    | S83          |
| 24   | Cu <sub>1</sub> Ni <sub>2</sub> N                     | 1.63                    | S84          |
| 25   | FeNi <sub>3</sub> N/rGO                               | 1.60                    | S85          |
| 26   | Ce-doped CoP                                          | 1.65                    | S86          |
| 27   | CeO <sub>2</sub> -CuCoO/NF                            | 1.63                    | S87          |
| 28   | CoCe-Ni <sub>3</sub> S <sub>2</sub> /NF               | 1.68                    | S88          |
| 29   | CeO <sub>x</sub> /CoP/NF                              | 1.63                    | S89          |
| 30   | Fe <sub>x</sub> Ni <sub>y</sub> /CeO <sub>2</sub> /NC | 1.70                    | S90          |

## References

- S1 T. Liu, M. Li, C. Jiao, M. Hassan, X. Bo, M. Zhou and H. L. Wang, *J. Mater. Chem. A*, 2017, **5**, 9377-9390.
- S2 M. Shalom, D. Ressnig, X. Yang, G. Clavel, T. P. Fellingner and M. Antonietti, *J. Mater. Chem. A*, **2015**, **3**, 8171-8177.
- S3 P. Chen, K. Xu, Y. Tong, X. Li, S. Tao, Z. Fang, W. Chu, X. Wu and C. Wu, *Inorg. Chem. Front.*, **2016**, **3**, 236-242.
- S4 X. Jia, Y. Zhao, G. Chen, L. Shang, R. Shi, X. Kang, G. I. N. Waterhouse, L. Z. Wu, C. H. Tung and T. Zhang, *Adv. Energy Mater.*, **2016**, **6**, 1502585-1502591.
- S5 Y. Wu, Y. Liu, B. Liu, W. Jiang, T. Zhou, H. Li, M. Shang, J. Lang, C. Liu and G. Che, *ACS Appl. Nano Mater.*, **2022**, **5**, 7714-7722.
- S6 V. Pundir, A. Gaur, R. Kaur, Aashi and V. Bagchi, *ACS Sustainable Chem. Eng.*, **2025**, **13**, 3491-3499.
- S7 T. Peng, Y. Guo, Y. Zhang, Y. Wang, D. Zhang, Y. Yang, Y. Lu, X. Liu, P. K. Chu and Y. Luo, *Appl. Surf. Sci.*, **2021**, **536**, 147982-147997.
- S8 Z. Xu, W. Zuo, Y. Yu, J. Liu, G. Cheng and P. Zhao, *Adv. Sci.*, **2024**, **11**, 2306758-2306768.
- S9 C. Zhu, A. L. Wang, W. Xiao, D. Chao, X. Zhang, N. H. Tiep, S. Chen, J. Kang, X. Wang, J. Ding and J. Wang, *Adv. Mater.*, **2018**, **30**, 1705516-1705533.
- S10 Q. Zhang, Y. Wang, Y. Wang, A. M. Al-Enizi, A. A. Elzatahry and G. Zheng, *J. Mater. Chem. A*, **2016**, **4**, 5713-5718.
- S11 G. Fu, Z. Cui, Y. Chen, L. Xu, Y. Tang and J. B. Goodenough, *Nano Energy*, **2017**, **39**, 77-85.
- S12 B. Ouyang, Y. Zhang, Z. Zhang, H. J. Fan and R. S. Rawat, *Small*, **2017**, **13**, 1604265-1604275.

- S13 L. Ma, L. R. L. Ting, V. Molinari, C. Giordano and B. S. Yeo, *J. Mater. Chem. A*, **2015**, **3**, 8361-8368.
- S14 H. Chu, D. Zhang, B. Jin and M. Yang, *Appl. Catal. B Environ.*, **2019**, **255**, 117744-117770.
- S15 J. Shi, Z. Pu, Q. Liu, A. M. Asiri, J. Hu and X. Sun, *Electrochim. Acta.*, 2015, **154**, 345-351.
- S16 Y. Wang, B. Zhang, W. Pan, H. Ma and J. Zhang, *ChemSusChem.*, 2017, **10**, 4170-4177.
- S17 J. Diao, Y. Qiu, S. Liu, W. Wang, K. Chen, H. Li, W. Yuan, Y. Qu and X. Guo, *Adv. Mater.*, 2020, **32**, 1905679-1905712.
- S18 X. Han, G. He, Y. He, J. Zhang, X. Zheng, L. Li, C. Zhong, W. Hu, Y. Deng and T. Ma, *Adv. Energy Mater.*, 2018, **8**, 1702222-1702255.
- S19 X. J. Cui, P. J. Ren, D. H. Deng, J. Deng and X. H. Bao, *Energy Environ. Sci.*, 2016, **9**, 123-129.
- S20 X. Peng, C. Huang, J. Dai and Y. Liu, *Int. J. Hydrogen Energy*, 2022, **47**, 4386-4393.
- S21 Y. Li, B. Jia, Y. Fan, K. Zhu, G. Li and C. Y. Su, *Adv. Energy Mater.*, 2018, **8**, 1702048-1702075.
- S22 A. Aijaz, J. Masa, C. Rösler, W. Xia, P. Weide, A. J. Botz, R. A. Fischer, W. Schuhmann and M. Muhler, *Angew. Chem. Int. Ed.*, 2016, **55**, 4087-4091.
- S23 C. Huang, B. Zhang, Y. Wu, Q. Ruan, L. Liu, J. Su, Y. Tang, R. Liu and P. K. Chu, *Appl. Catal. B Environ.*, 2021, **297**, 120461-120504.
- S24 J. Xia, H. Zhao, B. Huang, L. Xu, M. Luo, J. Wang, F. Luo, Y. Du and C. H. Yan, *Adv. Funct. Mater.*, 2020, **30**, 1908367-1908389.
- S25 J. H. Kim, K. Shin, K. Kawashima, D. H. Youn, J. Lin, T. E. Hong, Y. Liu, B. R. Wygant, J. Wang, G. Henkelman and C. B. Mullins, *ACS Catal.*, 2018, **8**, 4257-4265.

- S26 D. J. Li, Z. G. Gu, W. Zhang, Y. Kang and J. Zhang, *J. Mater. Chem. A*, 2017, **5**, 20126-20130.
- S27 B. Y. Xia, Y. Yan, N. Li, H. B. Wu, X. W. D. Lou and X. Wang, *Nat. Energy*, 2016, **1**, 1-8.
- S28 X. Li, Z. Niu, J. Jiang and L. Ai, *J. Mater. Chem. A*, 2016, **4**, 3204-3209.
- S29 X. Li, S. You, J. Du, Y. Dai, H. Chen, Z. Cai, N. Ren and J. Zou, *J. Mater. Chem. A*, 2019, **7**, 25853-25864.
- S30 W. Gao, Z. Xia, F. Cao, J. C. Ho, Z. Jiang and Y. Qu, *Adv. Funct. Mater.*, 2018, **28**, 1706056-1706064.
- S31 H. P. Guo, B. Y. Ruan, W. B. Luo, J. Deng, J. Z. Wang, H. K. Liu and S. X. Dou, *ACS Catal.*, 2018, **8**, 9686-9696.
- S32 H. Yan, C. Tian, L. Wang, A. Wu, M. Meng, L. Zhao and H. Fu, *Angew. Chem. Int. Ed.*, 2015, **54**, 6423-6427.
- S33 Y. Zhang, B. Ouyang, J. Xu, S. Chen, R. S. Rawat and H. J. Fan, *Adv. Energy Mater.*, 2016, **6**, 1600221-1600227.
- S34 Z. Wang, K. Zhao, H. Li, Z. Liu, Z. Shi, J. Lu, K. Suenaga, S. K. Joung, T. Okazaki, Z. Jin and Z. Gu, *J. Mater. Chem.*, 2011, **21**, 171-180.
- S35 H. Jin, H. Zhang, J. Chen, S. Mao, Z. Jiang and Y. Wang, *J. Mater. Chem. A*, 2018, **6**, 10967-10975.
- S36 W. F. Chen, K. Sasaki, C. Ma, A. I. Frenkel, N. Marinkovic, J. T. Muckerman, Y. Zhu and R. R. Adzic, *Angew. Chem. Int. Ed.*, 2012, **51**, 6131-6135.
- S37 B. Cao, G. M. Veith, J. C. Neufeind, R. R. Adzic and P. G. Khalifah, *J. Am. Chem. Soc.*, 2013, **135**, 19186-19192.
- S38 Y. Zhao, K. Kamiya, K. Hashimoto and S. Nakanishi, *Angew. Chem.*, 2013, **125**, 13883-13886.

- S39 X. Zhao, P. Pachfule, S. Li, J. R. J. Simke, J. Schmidt and A. Thomas, *Angew. Chem.*, 2018, **130**, 9059-9064.
- S40 K. Xu, P. Chen, X. Li, Y. Tong, H. Ding, X. Wu, W. Chu, Z. Peng, C. Wu and Y. Xie, *J. Am. Chem. Soc.*, 2015, **137**, 4119-4125.
- S41 P. Chen, K. Xu, Z. Fang, Y. Tong, J. Wu, X. Lu, X. Peng, H. Ding, C. Wu and Y. Xie, *Angew. Chem.*, 2015, **127**, 14923-14927.
- S42 X. Li, Y. Huang, D. Chu, K. Kajiyoshi, Y. Liu, Y. Zhao, Q. Chen, R. Liu, L. Cao, L. Feng and J. Huang, *ACS Appl. Nano Mater.*, 2025, **8**, 7026-7038.
- S43 Y. J. Song and Z. Y. Yuan, *Electrochim. Acta.*, 2017, **246**, 536-543.
- S44 X. Zou, X. Huang, A. Goswami, R. Silva, B. R. Sathe, E. Mikmeková and T. Asefa, *Angew. Chem.*, 2014, **126**, 4461-4465.
- S45 T. Ouyang, Y. Q. Ye, C. Y. Wu, K. Xiao and Z. Q. Liu, *Angew. Chem. Int. Ed.*, 2019, **58**, 4923-4928.
- S46 H. Vrubel and X. Hu, *Angew. Chem. Int. Ed.*, 2012, **51**, 12703-12706.
- S47 J. Deng, P. Ren, D. Deng, L. Yu, F. Yang and X. Bao, *Energy Environ. Sci.*, 2014, **7**, 1919-1923.
- S48 Y. Zheng, Y. Jiao, Y. Zhu, L. H. Li, Y. Han, Y. Chen, A. Du, M. Jaroniec and S. Z. Qiao, *Nat. Commun.*, 2014, **5**, 3783-3791.
- S49 Y. Zhao, F. Zhao, X. Wang, C. Xu, Z. Zhang, G. Shi and L. Qu, *Angew. Chem. Int. Ed.*, 2014, **53**, 13934-13939.
- S50 S. Gao, G. D. Li, Y. Liu, H. Chen, L. L. Feng, Y. Wang, M. Yang, D. Wang, S. Wang and X. Zou, *Nanoscale*, 2015, **7**, 2306-2316.
- S51 A. B. Laursen, S. Kegnæs, S. Dahl and I. Chorkendorff, *Energy Environ. Sci.*, 2012, **5**, 5577-5591.

- S52 J. Rashid, N. Parveen, T. u. Haq, A. Iqbal, S. H. Talib, S. U. Awan, N. Hussain and M. Zaheer, *ChemCatChem.*, 2018, **10**, 5587-5592.
- S53 M. M. Liu, Z. Y. Ji, X. P. Shen, H. Zhou, J. Zhu, X. L. Xie, C. S. Song, L. R. Miao, X. L. Kong and G. X. Zhu, *Eur. J. Inorg. Chem.*, 2018, **35**, 3952-3959.
- S54 L. Tian, H. Liu, X. Yi, X. Wang, L. Pang and J. Li, *Int. J. Hydrogen Energy*, 2023, **48**, 23831-23841.
- S55 T. Munawar, A. Bashir, K. M. Batoo, F. Mukhtar, M. S. Nadeem, S. Hussain, S. Manzoor, M. N. Ashiq, S. A. Khan, M. Koc and F. Iqbal, *J. Korean Ceram. Soc.*, 2024, **61**, 693-712.
- S56 M. C. Sung, G. H. Lee and D. W. Kim, *J. Alloys Compd.*, 2019, **800**, 450-455.
- S57 L. Chen, H. Jang, M. G. Kim, Q. Qin, X. Liu and J. Cho, *Inorg. Chem. Front.*, 2020, **7**, 470-476.
- S58 D. Ghosh and D. Pradhan, *Langmuir*, 2023, **39**, 3358-3370.
- S59 X. Guo, M. Li, L. Qiu, F. Tian, L. He, S. Geng, Y. Liu, Y. Song, W. Yang and Y. Yu, *Chem. Eng. J.*, 2023, **453**, 139796-139805.
- S60 L. Tian, H. Liu, B. Zhang, Y. Liu, S. Lv, L. Pang and J. Li, *ACS Appl. Nano Mater.*, 2021, **5**, 1252-1262.
- S61 W. K. Jo, S. Moru and S. Tonda, *ACS Sustainable Chem. Eng.*, 2019, **7**, 15373-15384.
- S62 M. Jiang, Y. Li, Z. Lu, X. Sun and X. Duan, *Inorg. Chem. Front.*, 2016, **3**, 630-634.
- S63 B. Zhang, C. Xiao, S. Xie, J. Liang, X. Chen and Y. Tang, *Chem. Mater.*, 2016, **28**, 6934-6941.
- S64 W. Huang, Y. Tong, D. Feng, Z. Guo, R. Ye and P. Chen, *ChemSusChem.*, 2023, **16**, 202202078-202202085.

- S65 T. Kavinkumar, H. Yang, A. T. Sivagurunathan, H. Jeong, J. W. Han and D. H. Kim, *Small*, 2023, **19**, 2300963-2300971.
- S66 C. Panda, P. W. Menezes, M. Zheng, S. Orthmann and M. Driess, *ACS Energy Lett.*, 2019, **4**, 747-754.
- S67 J. Zheng, X. Chen, X. Zhong, S. Li, T. Liu, G. Zhuang, X. Li, S. Deng, D. Mei and J. G. Wang, *Adv. Funct. Mater.*, 2017, **27**, 1704169-1704180.
- S68 Z. Yin, Y. Sun, C. Zhu, C. Li, X. Zhang and Y. Chen, *J. Mater. Chem. A*, 2017, **5**, 13648-13658.
- S69 L. Ai, J. Su, M. Wang and J. Jiang, *ACS Sustainable Chem. Eng.*, 2018, **6**, 9912-9920.
- S70 F. Yan, Y. Wang, K. Li, C. Zhu, P. Gao, C. Li, X. Zhang and Y. Chen, *Chem. Eur. J.*, 2017, **23**, 10187-10194.
- S71 J. Wang, Y. Sun, Y. Qi and C. Wang, *ACS Appl. Mater. Interfaces*, 2021, **13**, 57392-57402.
- S72 J. Xiang, W. Zou and H. Tang, *Catal. Sci. Technol.*, 2021, **11**, 6455-6461.
- S73 T. Dong, X. Zhang, Y. Cao, H. S. Chen and P. Yang, *Inorg. Chem. Front.*, 2019, **6**, 1073-1080.
- S74 Z. Y. Wu, W. B. Ji, B. C. Hu, H. W. Liang, X. X. Xu, Z. L. Yu, B. Y. Li and S. H. Yu, *Nano Energy*, 2018, **51**, 286-293.
- S75 X. Sun, Q. Shao, Y. Pi, J. Guo and X. Huang, *J. Mater. Chem. A*, 2017, **5**, 7769-7775.
- S76 A. Sivanantham, P. Ganesan and S. Shanmugam, *Adv. Funct. Mater.*, 2016, **26**, 4661-4672.
- S77 S. Li, Y. Wang, S. Peng, L. Zhang, A. M. Al-Enizi, H. Zhang, X. Sun and G. Zheng, *Adv. Energy Mater.*, 2016, **6**, 1501661-1501668.
- S78 Y. Zhang, B. Ouyang, J. Xu, G. Jia, S. Chen, R. S. Rawat and H. J. Fan, *Angew. Chem.*, 2016, **128**, 8812-8816.

- S79 Y. P. Zhu, Y. P. Liu, T. Z. Ren and Z. Y. Yuan, *Adv. Funct. Mater.*, 2015, **25**, 7337-7347.
- S80 P. Chen, T. Zhou, L. Xing, K. Xu, Y. Tong, H. Xie, L. Zhang, W. Yan, W. Chu, C. Wu and Y. Xie, *Angew. Chem.*, 2017, **129**, 625-629.
- S81 J. Li, X. Kong, M. Jiang and X. Lei, *Inorg. Chem. Front.*, 2018, **5**, 2906-2913.
- S82 S. Dutta, A. Indra, Y. Feng, H. Han and T. Song, *Appl. Catal. B Environ.*, 2019, **241**, 521-527.
- S83 Z. Chen, Y. Ha, Y. Liu, H. Wang, H. Yang, H. Xu, Y. Li and R. Wu, *ACS Appl. Mater. Interfaces*, 2018, **10**, 7134-7144.
- S84 Z. Wang, L. Xu, F. Huang, L. Qu, J. Li, K. A. Owusu, Z. Liu, Z. Lin, B. Xiang, X. Liu and K. Zhao, *Adv. Energy Mater.*, 2019, **9**, 1900390-1900401.
- S85 Y. Gu, S. Chen, J. Ren, Y. A. Jia, C. Chen, S. Komarneni, D. Yang and X. Yao, *ACS Nano.*, 2018, **12**, 245-253.
- S86 J. Li, S. Zou, X. Liu, Y. Lu and D. Dong, *ACS Sustainable Chem. Eng.*, 2020, **8**, 10009-10016.
- S87 L. Li, L. Cao, Q. He, B. Shang, J. Chen, J. Lei, N. Li and F. Pan, *Sustain. Energy Fuels*, 2020, **4**, 2775-2781.
- S88 Z. Yu, S. N. Song, Y. W. Dong, X. T. Gao, Q. F. Jiang and Z. Zhao, *ACS Appl. Nano Mater.*, 2024, **8**, 894-903.
- S89 T. Zhang, X. Wu, Y. Fan, C. Shan, B. Wang, H. Xu and Y. Tang, *ChemNanoMat.*, 2020, **6**, 1119-1126.
- S90 L. Chen, H. Jang, M. G. Kim, Q. Qin, X. Liu and J. Cho, *Inorg. Chem. Front.*, 2020, **7**, 470-476.
